# Supplementary material
Source: PubMed Central journal article supplement (PMC5899426)
Supplement: NIHMS928536-supplement-Supp_FigS1.pdf [file NIHMS928536-supplement-Supp_FigS1.pdf]

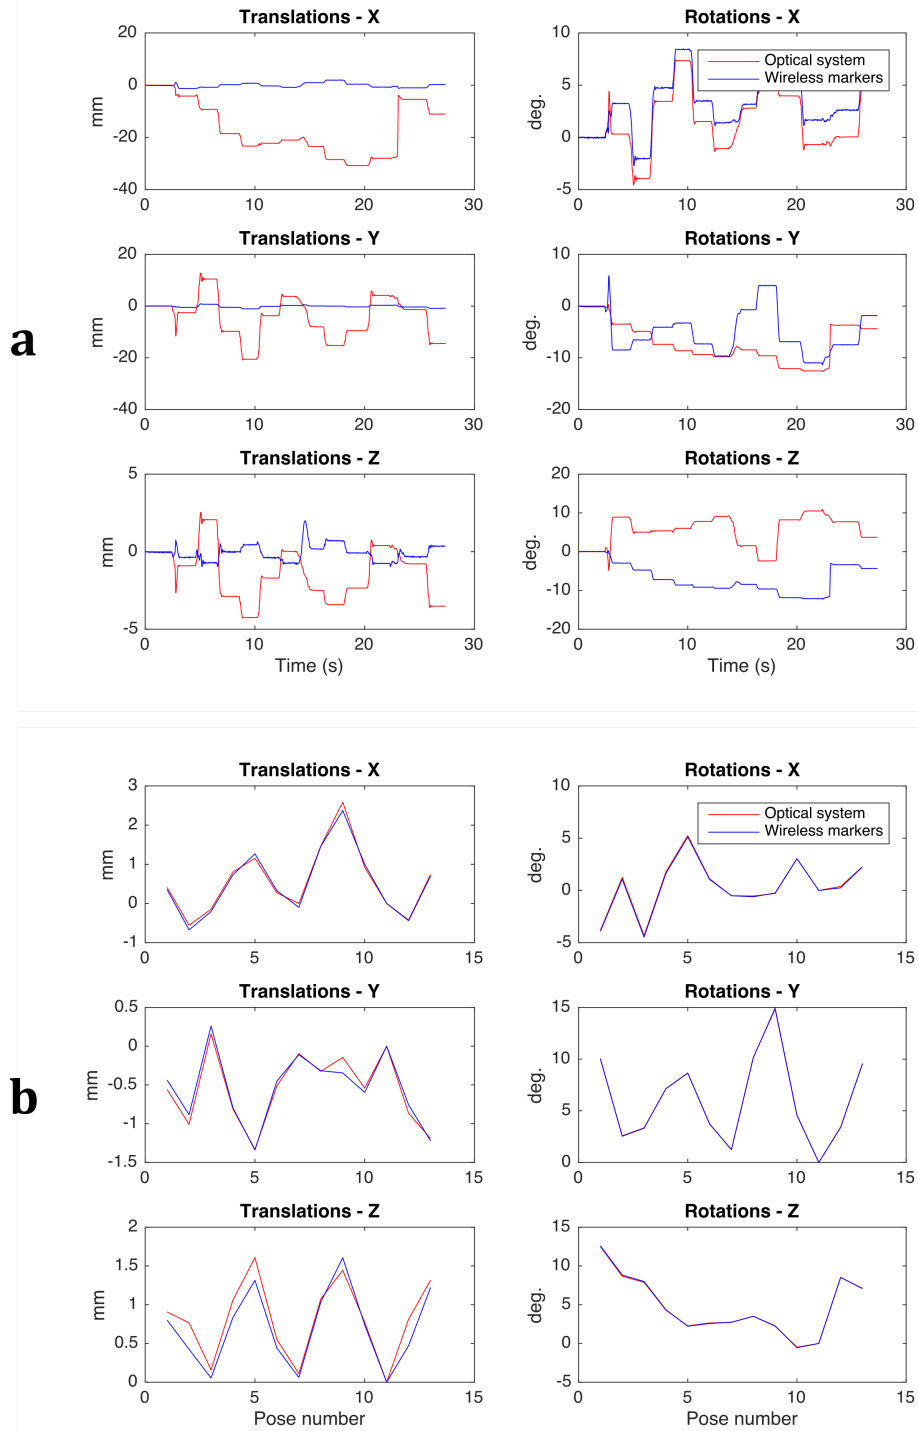

**Figure S1:** Result of a single calibration experiment: (a) plot of raw data collected from optical system (red curves) and wireless markers (blue curves), relative to the first position; (b) extracted poses from both the optical system and wireless markers; the optical data have been transformed to the MRI scanner reference frame using the calculated cross-calibration matrix  $T_{CS}$ .
